# Supplementary material for: Evogliptin Directly Inhibits Inflammatory and Fibrotic Signaling in Isolated Liver Cells
Source: MDPI journal article supplement (doi:10.3390/ijms231911636), 2022-10-01
Supplement: s1 [file s1]

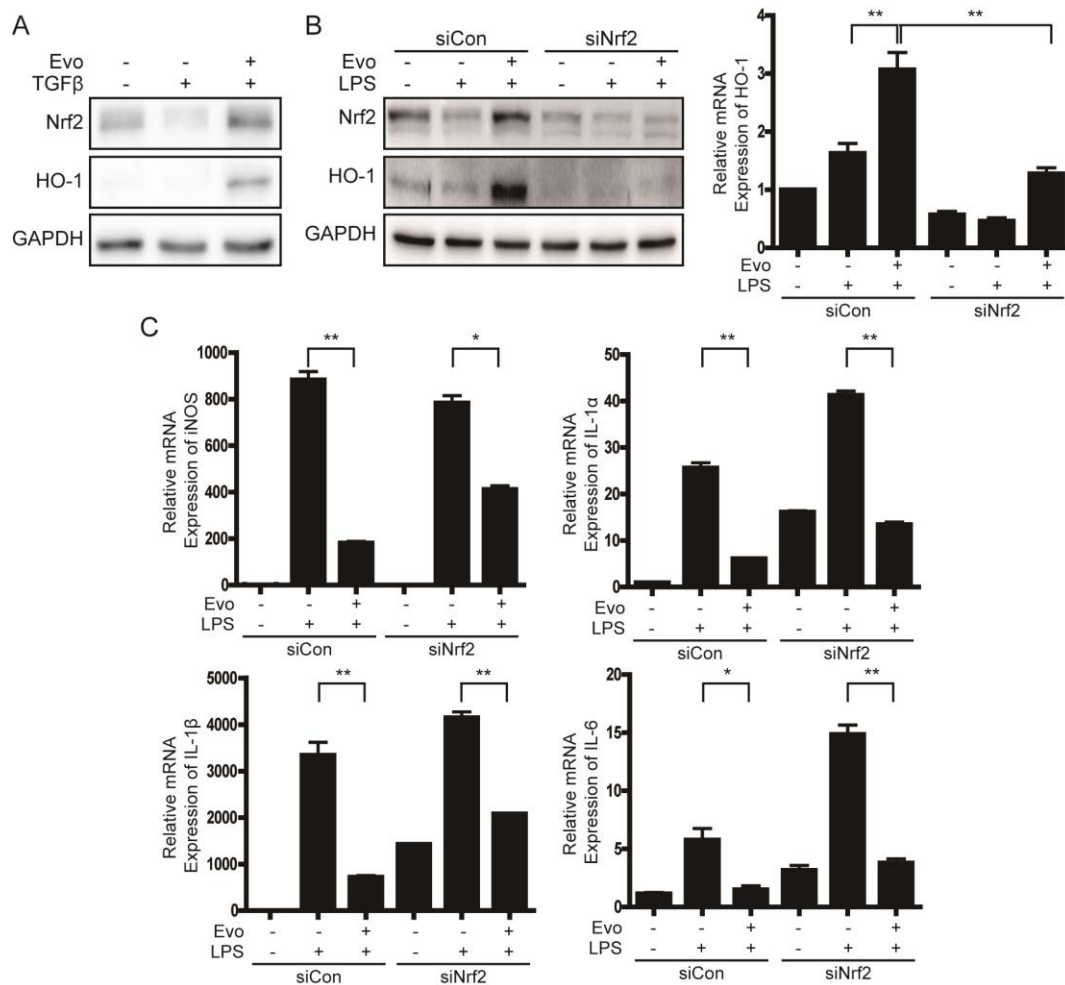

**Figure S1.** The effect of evogliptin on Nrf2/HO-1 expression.

(A) Primary hepatocyte was pretreated with LPS for 2h, and then exposed to evogliptin for 24 h. The expression of Nrf2 and HO-1 analyzed by western blot. Data represented in the bar graph are the mean  $\pm$  SEM of three independent measurements.  $**P < 0.01$ . (B) Primary HC transfected with Nrf2 siRNA or control (Con)-siRNA for 48 h were subjected to western blot analysis and real-time RT-PCR analysis. (C) Primary HC transfected with Nrf2 siRNA or control (Con)-siRNA for 48 h were subjected to real-time RT-PCR analysis using primers specific for Nrf2, HO-1, iNOS, IL1 $\alpha$ , IL1 $\beta$  and IL6.  $*P < 0.05$ ,  $**P < 0.01$ .

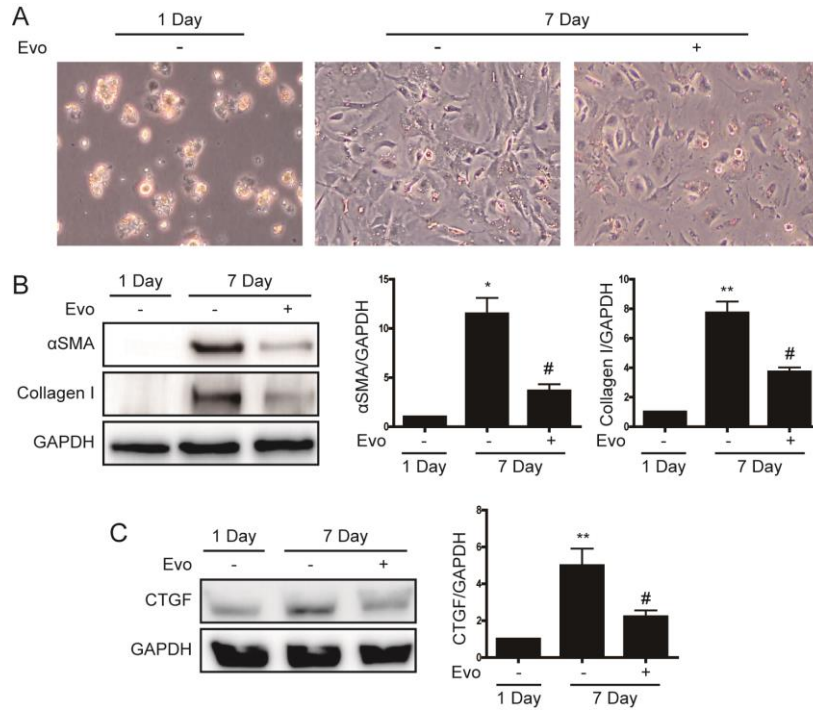

**Figure S2.** The inhibitory effect of evogliptin on hepatic stellate cell activation.

(A) Primary hepatic stellate cells morphology was analyzed using microscopy. Primary HSCs were cultured for 2 h, after which unattached cells and debris were removed by washing. HSCs were further cultured for three, five, and 7 days in DMEM containing 0.5% FBS with or without evogliptin. (B,C) Western blot analysis of SMA, collagen and CTGF expression in cultured HSCs. Data in the graph are represented as the mean  $\pm$  SEM. \* $P < 0.05$ , \*\* $P < 0.01$  relative to the 1 day. # $P < 0.05$  relative to the 7 days.
